# Supplementary material
Source: PubMed Central journal article supplement (PMC5368404)
Supplement: mmc1.pdf [file mmc1.pdf]

**YMTHE, Volume 25**

**Supplemental Information**

**Genome Editing Reveals Glioblastoma**

**Addiction to MicroRNA-10b**

**Rachid El Fatimy, Shruthi Subramanian, Erik J. Uhlmann, and Anna M. Krichevsky**

Supplementary Figures

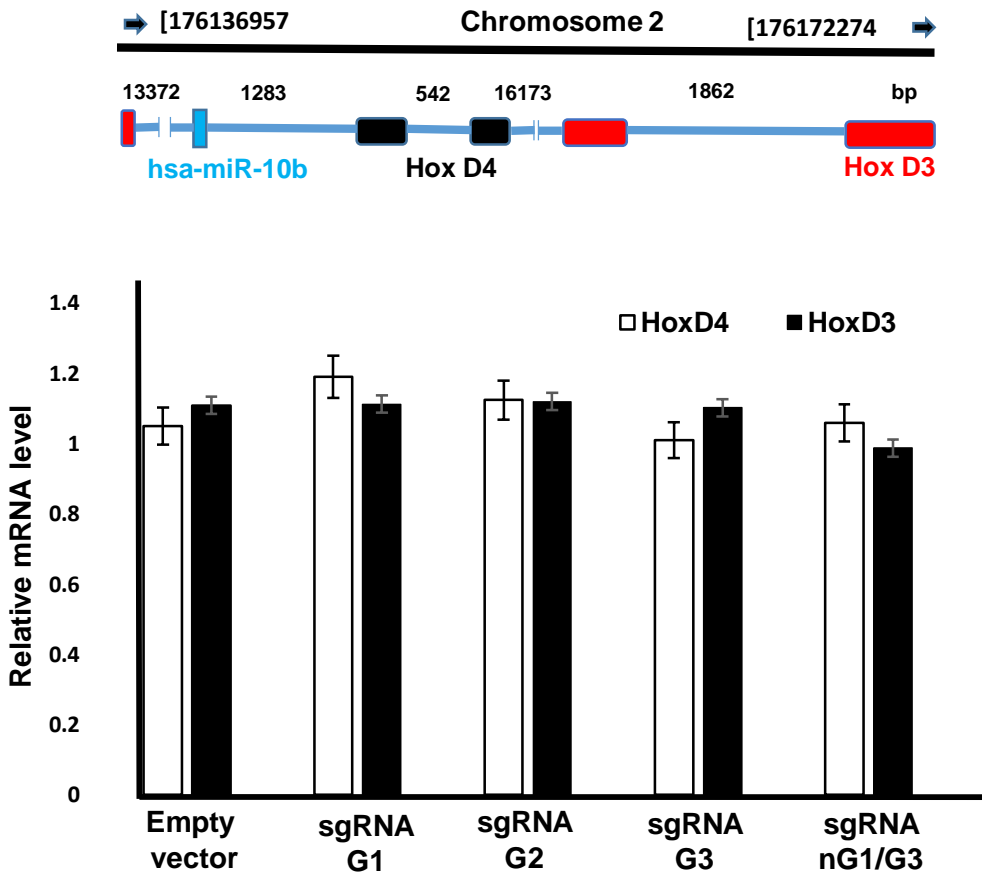

**Figure S1: miR-10b editing with G1-G3 sgRNAs does not affect the expression of adjacent HOXD4 and HOXD3 genes.** Schematic presentation of miR-10b located upstream of the *HOXD4* and embedded in the first intron separating two non-coding exons of *HOXD3*. Expression levels of *HOXD3* and *HOXD4* mRNAs were examined in LN229 glioma cells 48 hours after transfections with G1-G3 sgRNAs or double sgRNA guide nG1/G3.

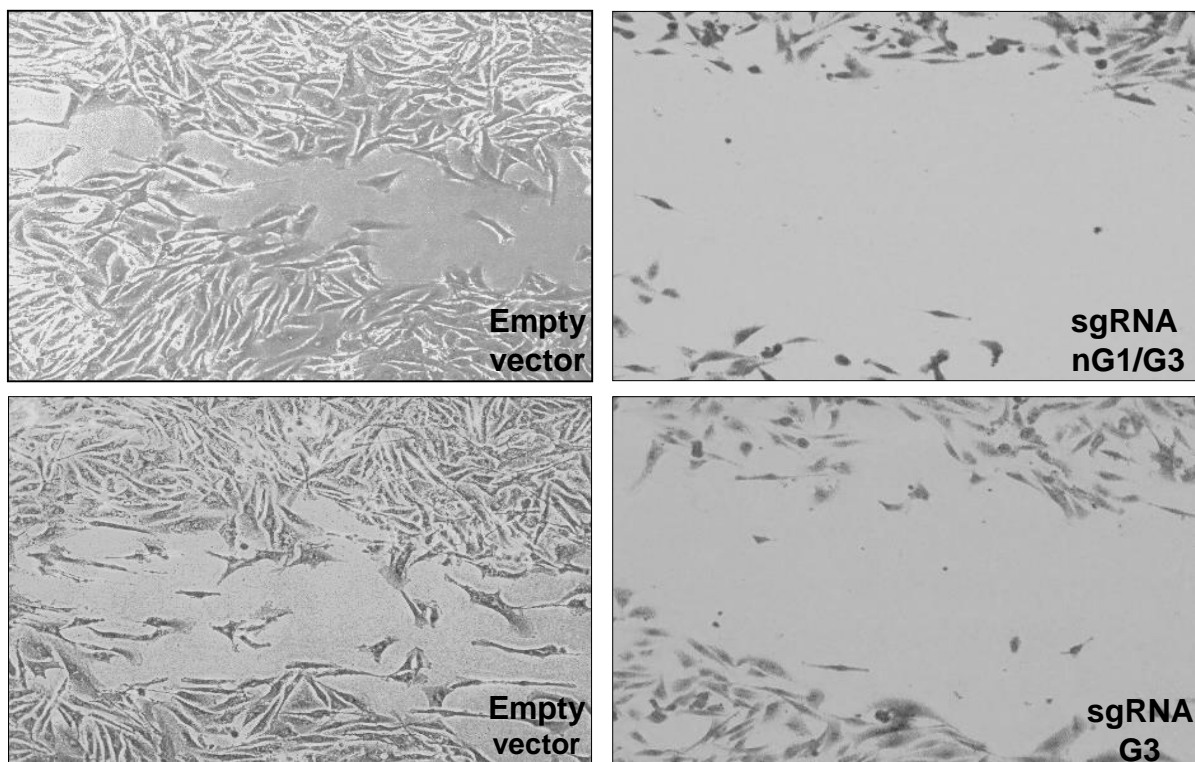

**Figure S2. CRISPR-Cas9/G3 mediated editing of miR-10b reduces migration of MDA-MB-231 cells as indicated by the scratch motility assay. The cell viability was not affected.**

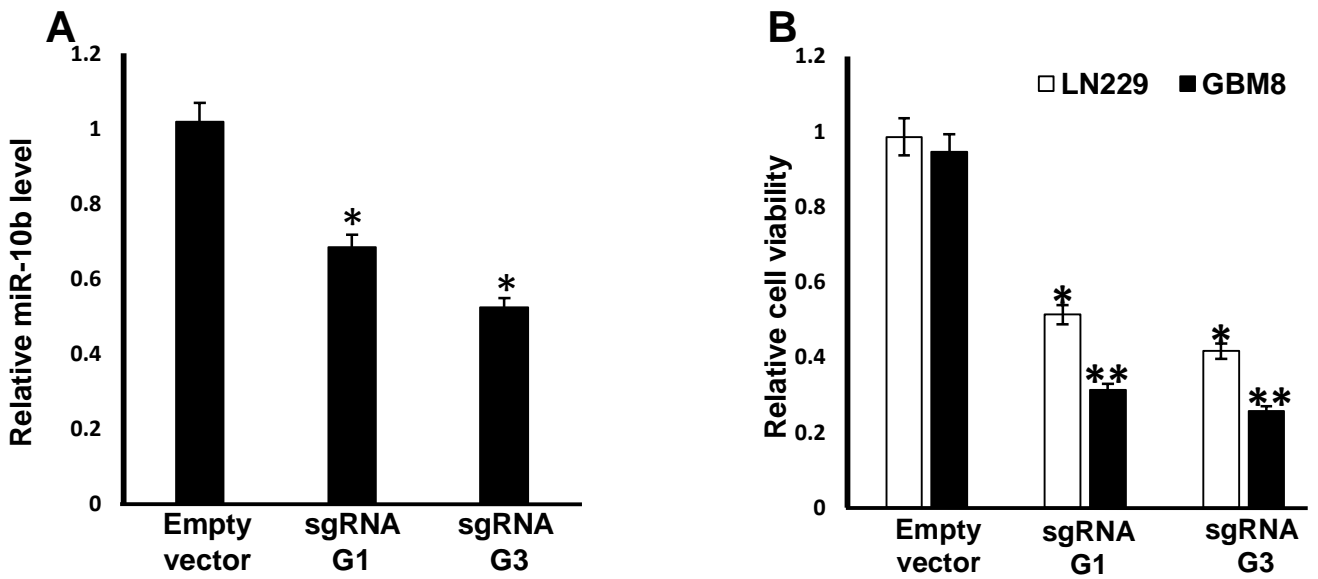

**Figure S3. Lentivirus-mediated miR-10b CRISPR-Cas9 editing reduces (A) miR-10b levels and (B) glioma cell viability as monitored by qRT-PCR and WST1 assays, respectively.**

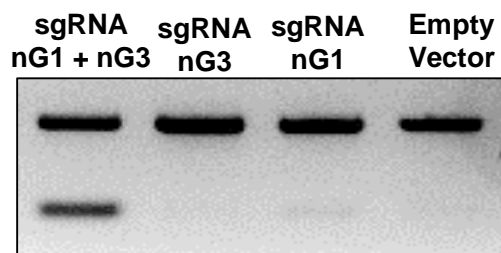

**Figure S4. Functional validation of lentivirus nCas9** in LN229 cells demonstrates efficient editing guided by a pair of sgRNAs targeting both strands (sgRNA nG1/G3), but not individual G1 or G3 sgRNAs.

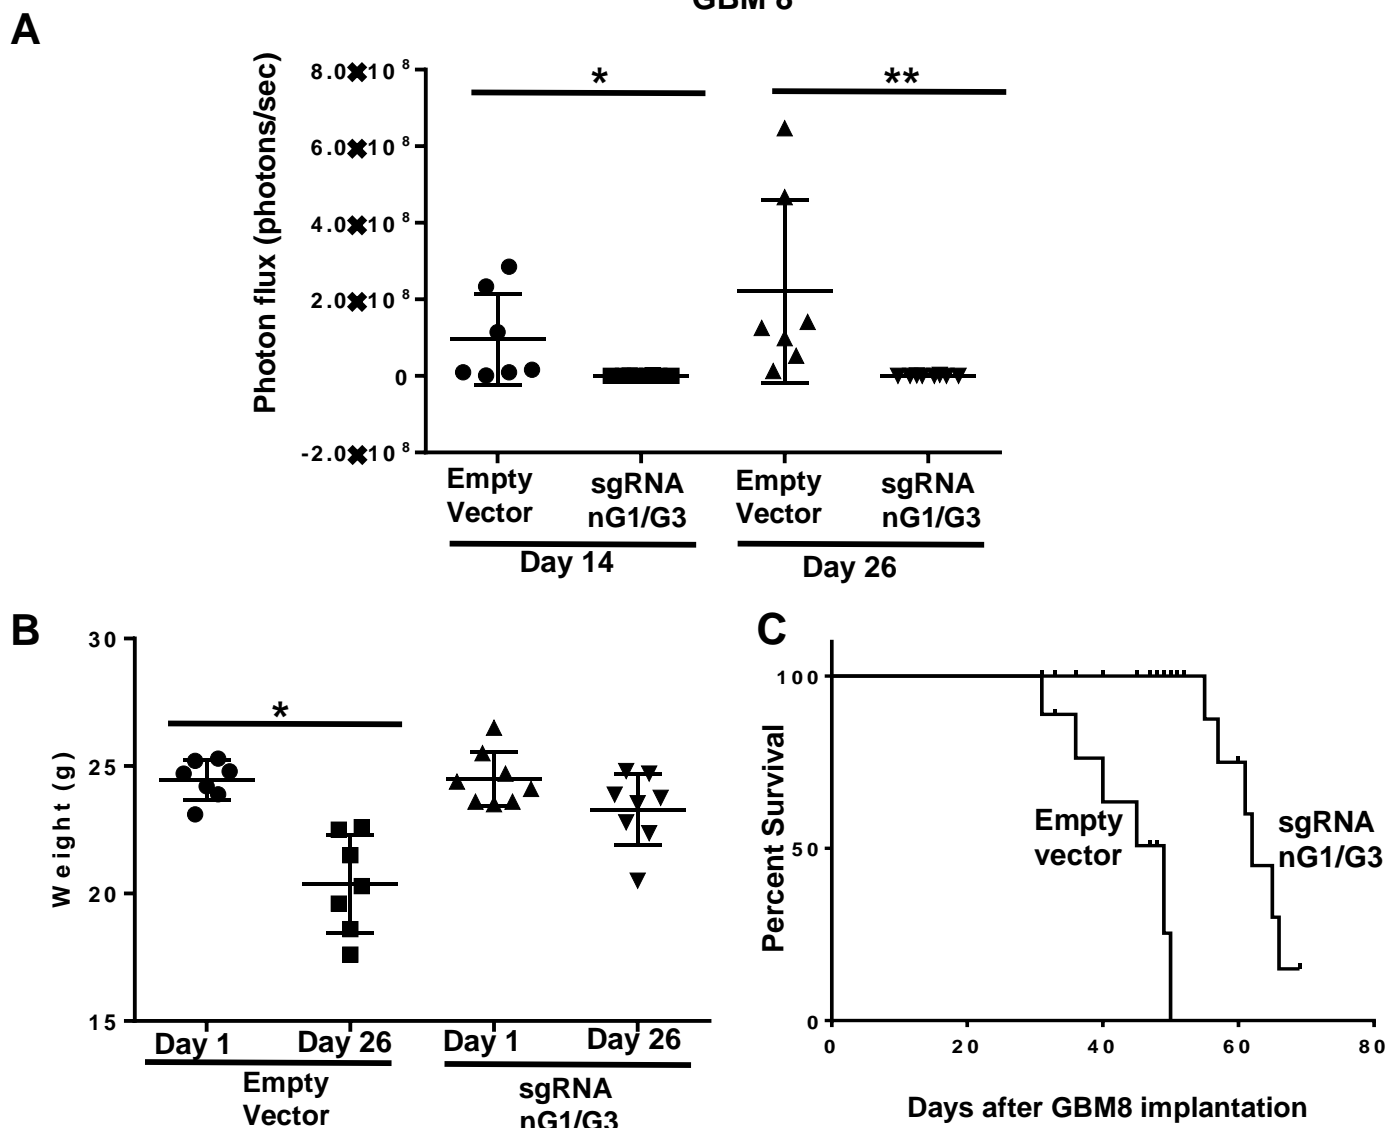

**Figure S5. Intratumoral injections of lentiviral miR-10b editing nCas9 “nickase” vectors ( $3 \times 10^5$  TU) strongly impair the growth of established orthotopic GBM8.** A. Tumor growth was monitored by luciferase imaging *in vivo*. There were 7-8 mice per group at the treatment initiation, and each dot represents an animal. The insert illustrates tumor imaging in representative animals. \* $P < 0.05$ , \*\* $P < 0.005$  by Student's *t*-test. B. miR-10b gene editing helps maintain the body weight in mice bearing intracranial tumors.  $n = 7-8$  animals per group. \* $P < 0.005$ . C. Survival curves. miR-10b editing significantly extends animal survival, analyzed by Kaplan-Meier plot.  $N = 8$  mice per group.  $P = 0.0001$  by log-rank (Mantel-Cox) test.

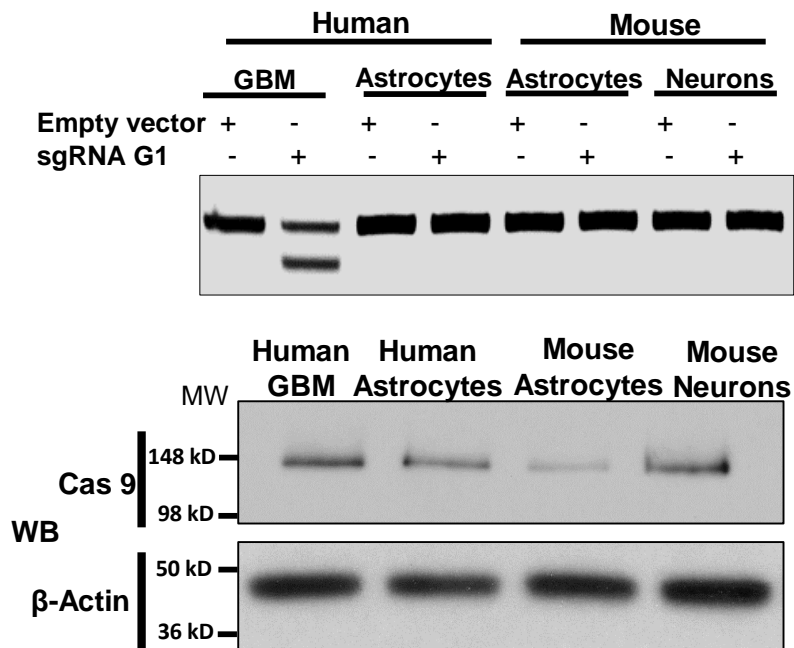

**Figure S6. Transduction of normal mouse and human primary neuroglial cultures with lentiviral miR-10b editing CRISPR/Cas9 vectors at  $3 \times 10^5$  TU does not result in miR-10b gene editing. Western blot analysis (lower panel) demonstrates the corresponding Cas9 expression at 48h post-transduction.**
